# Supplementary material for: The Role of Latin America’s Land and Water Resources for Global Food Security: Environmental Trade-Offs of Future Food Production Pathways
Source: PubMed Central journal article supplement (PMC4305321; doi:10.1371/journal.pone.0116733), 2015-01-24
Supplement: pone.0116733.s003.pdf [file pone.0116733.s003.pdf]

### **S3 Text. Water scarce Food Producing Units**

Water scarcity is given where irrigation water supply reliability is smaller one or where total renewable water resources over total water withdrawals is larger than 20% at some point in time between 2010 and 2050. Food Producing Units (FPU) that suffer from water scarcity are:

- The Caribbean, Central-America (CAR\_CCA)
- Cuba, Central-America (CUB\_CCA)
- North-East Brazil (NEB\_BRA)
- Parana, Brazil (PAR\_BRA)
- Coastal Peru (PEC\_PER)
- Salada-Tierra, Argentina (SAL\_ARG)
- Tocantins, Brazil (TOC\_BRA)
- Uruguay, Brazil (URU\_BRA)
- Uruguay, Uruguay (URU\_URU)
- Yucatan, Central-America (YUC\_CCA)

A list of all FPUs can be found in S1 Table with the corresponding map in S1 Figure.
