# Supplementary material for: The Role of Latin America’s Land and Water Resources for Global Food Security: Environmental Trade-Offs of Future Food Production Pathways
Source: PubMed Central journal article supplement (PMC4305321; doi:10.1371/journal.pone.0116733), 2015-01-24
Supplement: pone.0116733.s012.pdf [file pone.0116733.s012.pdf]

**S1 Table. Definition of Food Producing Unit codes**

| <b>FPU code</b> | <b>FPU in LAC</b>                                 |
|-----------------|---------------------------------------------------|
| AMA_BRA         | Amazon, Brazil                                    |
| AMA_CSA         | Amazon, Central-South-America                     |
| AMA_COL         | Amazon, Colombia                                  |
| AMA_ECU         | Amazon, Ecuador                                   |
| AMA_PER         | Amazon, Peru                                      |
| CAR_CCA         | Caribbean, Caribbean-Central-America              |
| CAM_CCA         | Central-America, Caribbean-Central-America        |
| CHC_CHL         | Chile-Coast, Chile                                |
| CUB_CCA         | Cuba, Caribbean-Central-America                   |
| MIM_MEX         | Middle-Mexico, Mexico                             |
| NSA_NSA         | North-South-America-Coast, Northern-South-America |
| NEB_BRA         | Northeast-Brazil, Brazil                          |
| NWS_COL         | Northwest-South-America, Colombia                 |
| NWS_ECU         | Northwest-South-America, Ecuador                  |
| ORI_COL         | Orinoco, Colombia                                 |
| ORI_NSA         | Orinoco, Northern-South-America                   |
| PAR_ARG         | Parana, Argentina                                 |
| PAR_BRA         | Parana, Brazil                                    |
| PAR_CSA         | Parana, Central-South-America                     |
| PEC_PER         | Peru-Coastal, Peru                                |
| RIC_ARG         | Rio-Colorado, Argentina                           |
| RIG_MEX         | Rio-Grande, Mexico                                |
| SAL_ARG         | Salada-Tierra, Argentina                          |
| SAN_BRA         | San-Francisco, Brazil                             |
| TIE_ARG         | Tierra, Argentina                                 |
| TOC_BRA         | Toc, Brazil                                       |
| UME_MEX         | Upper Mexico, Mexico                              |
| URU_BRA         | Uruguay, Brazil                                   |
| URU_URU         | Uruguay, Uruguay                                  |
| YUC_CCA         | Yucatan, Caribbean-Central-America                |
| YUC_MEX         | Yucatan, Mexico                                   |

Note: FPU = Food Producing Unit. To locate specific Food Producing Unit see S1 Figure. CCA = Belize, Costa Rica, Cuba, Dominican Republic, El Salvador, Guatemala, Haiti, Honduras, Nicaragua, Panama; CSA = Bolivia, Paraguay; NSA = Guyana, Surinam, Venezuela.
