# Supplementary material for: The Role of Latin America’s Land and Water Resources for Global Food Security: Environmental Trade-Offs of Future Food Production Pathways
Source: PubMed Central journal article supplement (PMC4305321; doi:10.1371/journal.pone.0116733), 2015-01-24
Supplement: pone.0116733.s013.pdf [file pone.0116733.s013.pdf]

**S2 Table. Food Producing Units with remaining yield gaps in  
2050 in Latin America and the Caribbean (in tons/hectare)**

| FPU     | Crop     | Irrigated/<br>Rainfed | Observed<br>yield, year<br>2000 | Projected<br>yield<br>(BAU),<br>year 2050 | 75% of<br>attainable<br>yield, year<br>2000 | Yield gap,<br>year 2000 | Remaining<br>yield gap,<br>year 2050 |
|---------|----------|-----------------------|---------------------------------|-------------------------------------------|---------------------------------------------|-------------------------|--------------------------------------|
| AMA_COL | Wheat    | rainfed               | 2.05                            | 3.72                                      | 4.59                                        | 2.54                    | 0.88                                 |
| AMA_CSA | Potatoes | irrigated             | 11.62                           | 18.87                                     | 26.30                                       | 14.68                   | 7.43                                 |
| AMA_CSA | Potatoes | rainfed               | 6.00                            | 9.04                                      | 17.59                                       | 11.59                   | 8.56                                 |
| AMA_ECU | Maize    | irrigated             | 2.03                            | 5.59                                      | 6.09                                        | 4.06                    | 0.50                                 |
| AMA_ECU | Maize    | rainfed               | 1.06                            | 2.94                                      | 4.68                                        | 3.62                    | 1.74                                 |
| AMA_ECU | Potatoes | irrigated             | 9.01                            | 13.92                                     | 26.08                                       | 17.06                   | 12.16                                |
| AMA_ECU | Potatoes | rainfed               | 5.68                            | 5.97                                      | 20.54                                       | 14.86                   | 14.57                                |
| AMA_ECU | Wheat    | irrigated             | 0.64                            | 1.63                                      | 4.83                                        | 4.19                    | 3.20                                 |
| AMA_PER | Maize    | rainfed               | 1.67                            | 3.20                                      | 3.30                                        | 1.64                    | 0.10                                 |
| AMA_PER | Potatoes | irrigated             | 15.68                           | 22.31                                     | 27.36                                       | 11.68                   | 5.05                                 |
| AMA_PER | Potatoes | rainfed               | 7.96                            | 6.94                                      | 18.36                                       | 10.40                   | 11.41                                |
| AMA_PER | Soybeans | rainfed               | 1.46                            | 1.26                                      | 1.75                                        | 0.28                    | 0.48                                 |
| AMA_PER | Wheat    | rainfed               | 1.28                            | 2.02                                      | 4.09                                        | 2.81                    | 2.07                                 |
| CAM_CCA | Maize    | rainfed               | 1.55                            | 2.61                                      | 3.22                                        | 1.67                    | 0.61                                 |
| CAR_CCA | Maize    | rainfed               | 1.54                            | 2.17                                      | 2.81                                        | 1.27                    | 0.64                                 |
| CAR_CCA | Sorghum  | rainfed               | 0.63                            | 1.33                                      | 1.77                                        | 1.14                    | 0.44                                 |
| CHC_CHL | Potatoes | rainfed               | 14.36                           | 14.17                                     | 22.79                                       | 8.42                    | 8.61                                 |
| CUB_CCA | Maize    | rainfed               | 1.55                            | 2.32                                      | 3.99                                        | 2.44                    | 1.68                                 |
| CUB_CCA | Sorghum  | rainfed               | 0.64                            | 1.18                                      | 1.95                                        | 1.32                    | 0.77                                 |
| MIM_MEX | Maize    | rainfed               | 2.13                            | 2.77                                      | 2.81                                        | 0.67                    | 0.04                                 |
| MIM_MEX | Potatoes | rainfed               | 13.89                           | 14.40                                     | 16.90                                       | 3.01                    | 2.51                                 |
| NSA_NSA | Maize    | rainfed               | 1.97                            | 2.57                                      | 2.99                                        | 1.02                    | 0.43                                 |
| NWS_COL | Maize    | rainfed               | 1.93                            | 3.32                                      | 3.49                                        | 1.56                    | 0.16                                 |
| NWS_ECU | Potatoes | irrigated             | 9.03                            | 13.95                                     | 21.67                                       | 12.64                   | 7.72                                 |
| NWS_ECU | Potatoes | rainfed               | 5.68                            | 6.17                                      | 14.90                                       | 9.21                    | 8.73                                 |
| NWS_ECU | Soybeans | rainfed               | 1.80                            | 1.31                                      | 1.89                                        | 0.09                    | 0.58                                 |
| NWS_ECU | Wheat    | irrigated             | 0.65                            | 1.67                                      | 3.34                                        | 2.69                    | 1.67                                 |
| ORL_COL | Maize    | rainfed               | 1.93                            | 3.33                                      | 3.75                                        | 1.82                    | 0.42                                 |
| ORL_NSA | Wheat    | rainfed               | 0.39                            | 1.50                                      | 1.60                                        | 1.22                    | 0.11                                 |
| PAR_ARG | Potatoes | rainfed               | 15.58                           | 16.37                                     | 18.21                                       | 2.63                    | 1.83                                 |
| PAR_CSA | Potatoes | irrigated             | 11.58                           | 18.71                                     | 27.19                                       | 15.61                   | 8.48                                 |
| PAR_CSA | Potatoes | rainfed               | 5.91                            | 7.92                                      | 14.62                                       | 8.71                    | 6.70                                 |
| PEC_PER | Maize    | rainfed               | 1.66                            | 1.95                                      | 4.09                                        | 2.43                    | 2.14                                 |
| PEC_PER | Potatoes | irrigated             | 15.63                           | 22.16                                     | 28.33                                       | 12.70                   | 6.17                                 |
| PEC_PER | Potatoes | rainfed               | 7.94                            | 6.97                                      | 19.26                                       | 11.32                   | 12.29                                |
| PEC_PER | Wheat    | rainfed               | 1.27                            | 1.41                                      | 2.31                                        | 1.04                    | 0.90                                 |
| RIC_ARG | Potatoes | rainfed               | 15.62                           | 15.21                                     | 21.38                                       | 5.76                    | 6.17                                 |
| RIG_MEX | Maize    | rainfed               | 2.14                            | 2.62                                      | 4.33                                        | 2.19                    | 1.71                                 |
| RIG_MEX | Potatoes | rainfed               | 13.90                           | 14.07                                     | 14.91                                       | 1.01                    | 0.83                                 |
| SAL_ARG | Potatoes | rainfed               | 15.66                           | 16.19                                     | 17.97                                       | 2.30                    | 1.77                                 |
| TIE_ARG | Potatoes | rainfed               | 15.62                           | 14.44                                     | 19.83                                       | 4.21                    | 5.39                                 |
| UME_MEX | Maize    | rainfed               | 2.15                            | 2.92                                      | 4.52                                        | 2.37                    | 1.60                                 |
| URU_URU | Soybeans | rainfed               | 1.79                            | 1.64                                      | 2.15                                        | 0.36                    | 0.51                                 |
| YUC_CCA | Maize    | rainfed               | 1.56                            | 2.56                                      | 3.61                                        | 2.05                    | 1.05                                 |
| YUC_CCA | Sorghum  | rainfed               | 0.64                            | 1.55                                      | 2.21                                        | 1.57                    | 0.66                                 |
| YUC_MEX | Wheat    | rainfed               | 3.17                            | 3.02                                      | 3.40                                        | 0.23                    | 0.39                                 |

Note: BAU refers to the Business-as-Usual scenario. Scenarios are described in Table 1 in the main text. FPU = Food Producing Unit. To locate Food Producing Units see S1 Figure and S1 Table.
