# Supplementary material for: The Role of Latin America’s Land and Water Resources for Global Food Security: Environmental Trade-Offs of Future Food Production Pathways
Source: PubMed Central journal article supplement (PMC4305321; doi:10.1371/journal.pone.0116733), 2015-01-24
Supplement: pone.0116733.s014.pdf [file pone.0116733.s014.pdf]

**S3 Table. Irrigation water supply reliability in selected water stressed Food Producing Units in Latin America and the Caribbean in 2010 and 2050**

| FPU                                      | Year | (1) BAU | (1a) BAU liberal | (2) Intensification | (3) Sustainable intensification | (4) Yield gaps closed | (5) Extensification |
|------------------------------------------|------|---------|------------------|---------------------|---------------------------------|-----------------------|---------------------|
| <b>Central America and the Caribbean</b> |      |         |                  |                     |                                 |                       |                     |
| CUB_CCA                                  | 2010 | 0.75    | 0.75             | 0.75                | 0.75                            | 0.75                  | 0.75                |
|                                          | 2050 | 0.45    | 0.45             | 0.40                | 0.55                            | 0.40                  | 0.50                |
| YUC_CCA                                  | 2010 | 0.57    | 0.57             | 0.57                | 0.57                            | 0.57                  | 0.57                |
|                                          | 2050 | 0.70    | 0.69             | 0.68                | 0.92                            | 0.68                  | 0.70                |
| CAR_CCA                                  | 2010 | 0.65    | 0.65             | 0.65                | 0.65                            | 0.65                  | 0.65                |
|                                          | 2050 | 0.73    | 0.73             | 0.71                | 0.87                            | 0.71                  | 0.75                |
| <b>South America</b>                     |      |         |                  |                     |                                 |                       |                     |
| TOC_BRA                                  | 2010 | 0.11    | 0.11             | 0.11                | 0.11                            | 0.11                  | 0.11                |
|                                          | 2050 | 0.10    | 0.11             | 0.11                | 0.11                            | 0.11                  | 0.10                |
| URU_BRA                                  | 2010 | 0.21    | 0.21             | 0.21                | 0.21                            | 0.21                  | 0.21                |
|                                          | 2050 | 0.41    | 0.42             | 0.40                | 0.54                            | 0.40                  | 0.44                |
| PEC_PER                                  | 2010 | 0.67    | 0.67             | 0.67                | 0.67                            | 0.67                  | 0.67                |
|                                          | 2050 | 0.44    | 0.44             | 0.42                | 0.57                            | 0.42                  | 0.45                |
| NEB_BRA                                  | 2010 | 0.81    | 0.81             | 0.81                | 0.81                            | 0.81                  | 0.81                |
|                                          | 2050 | 0.56    | 0.56             | 0.50                | 0.68                            | 0.49                  | 0.61                |
| SAL_ARG                                  | 2010 | 0.96    | 0.96             | 0.96                | 0.96                            | 0.96                  | 0.96                |
|                                          | 2050 | 0.73    | 0.72             | 0.66                | 0.88                            | 0.65                  | 0.78                |
| URU_URU                                  | 2010 | 0.60    | 0.60             | 0.60                | 0.60                            | 0.60                  | 0.60                |
|                                          | 2050 | 0.77    | 0.76             | 0.73                | 0.73                            | 0.73                  | 0.79                |
| PAR_BRA                                  | 2010 | 1.00    | 1.00             | 1.00                | 1.00                            | 1.00                  | 1.00                |
|                                          | 2050 | 0.83    | 0.82             | 0.72                | 0.97                            | 0.70                  | 0.93                |

Note: The indicator irrigation water supply reliability takes on values between zero and one, with lower values indicating severe water scarcity and values closer to one low water scarcity. FPU = Food Producing Unit. To locate Food Producing Units see S1 Figure and S1 Table. BAU refers to the Business-as-Usual scenario. Scenarios are described in Table 1 in the main text. Those FPUs are listed first that suffer the most from water stress under BAU (1) in 2050.
