# Supplementary material for: The Role of Latin America’s Land and Water Resources for Global Food Security: Environmental Trade-Offs of Future Food Production Pathways
Source: PubMed Central journal article supplement (PMC4305321; doi:10.1371/journal.pone.0116733), 2015-01-24
Supplement: pone.0116733.s015.pdf [file pone.0116733.s015.pdf]

**S4 Table. Changes in nitrogen-emission rates between the base year 2000 and 2050 across different Food Producing Units in Latin America and the Caribbean (in %)**

| FPU                                      | (1) BAU | (1a) BAU liberal | (1.6) Intensification | (3a) Sustainable intensification (Improved NUE) | Sustainable intensification (Precision agriculture) | (3b) Sustainable intensification (Precision agriculture) | (4) Yield gaps closed | Yield | (5) Extensification |
|------------------------------------------|---------|------------------|-----------------------|-------------------------------------------------|-----------------------------------------------------|----------------------------------------------------------|-----------------------|-------|---------------------|
| <b>Central America and the Caribbean</b> |         |                  |                       |                                                 |                                                     |                                                          |                       |       |                     |
| MIM_MEX                                  | 197     | 208              | 186                   | 134                                             | -59                                                 | 238                                                      | 197                   |       |                     |
| YUC_MEX                                  | 97      | 104              | 99                    | 75                                              | -14                                                 | 106                                                      | 87                    |       |                     |
| CAR_CCA                                  | 79      | 86               | 94                    | 66                                              | -6                                                  | 91                                                       | 82                    |       |                     |
| CAM_CCA                                  | 41      | 45               | 41                    | 31                                              | -39                                                 | 51                                                       | 43                    |       |                     |
| YUC_CCA                                  | 16      | 19               | 8                     | 16                                              | -20                                                 | 33                                                       | 35                    |       |                     |
| UME_MEX                                  | -34     | -34              | -38                   | -38                                             | -53                                                 | -29                                                      | -32                   |       |                     |
| CUB_CCA                                  | -39     | -37              | -41                   | -45                                             | -70                                                 | -39                                                      | -44                   |       |                     |
| RIG_MEX                                  | -53     | -53              | -55                   | -55                                             | -62                                                 | -51                                                      | -52                   |       |                     |
| <b>South America</b>                     |         |                  |                       |                                                 |                                                     |                                                          |                       |       |                     |
| NSA_NSA                                  | 1164    | 1239             | 1432                  | 1202                                            | 1156                                                | 1211                                                     | 1209                  |       |                     |
| NEB_BRA                                  | 444     | 453              | 488                   | 384                                             | 293                                                 | 415                                                      | 409                   |       |                     |
| AMA_COL                                  | 381     | 399              | 434                   | 392                                             | 365                                                 | 398                                                      | 393                   |       |                     |
| PEC_PER                                  | 249     | 255              | 246                   | 256                                             | 226                                                 | 264                                                      | 262                   |       |                     |
| URU_URU                                  | 225     | 257              | 312                   | 245                                             | 209                                                 | 254                                                      | 252                   |       |                     |
| AMA_ECU                                  | 197     | 219              | 258                   | 199                                             | 158                                                 | 212                                                      | 223                   |       |                     |
| SAL_ARG                                  | 129     | 141              | 154                   | 89                                              | 63                                                  | 104                                                      | 102                   |       |                     |
| ORL_NSA                                  | 121     | 139              | 157                   | 127                                             | 58                                                  | 148                                                      | 135                   |       |                     |
| PAR_ARG                                  | 117     | 128              | 143                   | 83                                              | 70                                                  | 90                                                       | 92                    |       |                     |
| CHC_CHL                                  | 108     | 136              | 120                   | 100                                             | -44                                                 | 163                                                      | 138                   |       |                     |
| NWS_ECU                                  | 99      | 108              | 107                   | 75                                              | -44                                                 | 109                                                      | 97                    |       |                     |
| PAR_BRA                                  | 89      | 98               | 100                   | 63                                              | -11                                                 | 82                                                       | 73                    |       |                     |
| PAR_CSA                                  | 83      | 91               | 107                   | 84                                              | 74                                                  | 87                                                       | 88                    |       |                     |
| AMA_CSA                                  | 76      | 92               | 117                   | 83                                              | 70                                                  | 86                                                       | 87                    |       |                     |
| AMA_PER                                  | 70      | 83               | 95                    | 67                                              | 13                                                  | 86                                                       | 86                    |       |                     |
| URU_BRA                                  | 63      | 68               | 72                    | 46                                              | 37                                                  | 49                                                       | 50                    |       |                     |
| NWS_COL                                  | 56      | 69               | 73                    | 58                                              | 25                                                  | 66                                                       | 65                    |       |                     |
| AMA_BRA                                  | 56      | 66               | 72                    | 42                                              | 14                                                  | 50                                                       | 47                    |       |                     |
| ORL_COL                                  | 55      | 55               | 55                    | 53                                              | 42                                                  | 55                                                       | 54                    |       |                     |
| SAN_BRA                                  | 51      | 59               | 63                    | 32                                              | -24                                                 | 47                                                       | 41                    |       |                     |
| TOC_BRA                                  | 27      | 29               | 37                    | 19                                              | 13                                                  | 21                                                       | 19                    |       |                     |
| TIE_ARG                                  | -6      | -6               | -6                    | -6                                              | -6                                                  | -6                                                       | -6                    |       |                     |
| RIC_ARG                                  | -12     | -11              | -14                   | -13                                             | -26                                                 | -9                                                       | -11                   |       |                     |

FPU = Food Producing Unit. To locate Food Producing Units see S1 Figure and S1 Table. Note: The table is organized in such a way that those Food Producing Units (FPU) where the increase in N-emissions are highest under (1) BAU, appear in the upper rows. BAU refers to the Business-as-Usual scenario. Scenarios are described in Table 1 in the main text.
