# Supplementary material for: The Role of Latin America’s Land and Water Resources for Global Food Security: Environmental Trade-Offs of Future Food Production Pathways
Source: PubMed Central journal article supplement (PMC4305321; doi:10.1371/journal.pone.0116733), 2015-01-24
Supplement: pone.0116733.s016.pdf [file pone.0116733.s016.pdf]

**S5 Table. Net changes in carbon stock losses due to crop production across Food Producing Units in Latin America and the Caribbean between 2010 to 2050 (in million tons)**

| FPU                                      | (1) BAU     |             | (1a) BAU liberal |             | (2) Intensification / (3) Sust.-intens. |             | (4) Yield gaps closed |             | (5) Extensification |             |
|------------------------------------------|-------------|-------------|------------------|-------------|-----------------------------------------|-------------|-----------------------|-------------|---------------------|-------------|
|                                          | lower bound | upper bound | lower bound      | upper bound | lower bound                             | upper bound | lower bound           | upper bound | lower bound         | upper bound |
| <b>Central America and the Caribbean</b> |             |             |                  |             |                                         |             |                       |             |                     |             |
| CAM_CCA                                  | 22          | 58          | 28               | 67          | 5                                       | 22          | 12                    | 33          | 40                  | 86          |
| MIM_MEX                                  | 7           | 20          | 9                | 24          | -20                                     | -31         | -16                   | -22         | 20                  | 42          |
| YUC_CCA                                  | 8           | 18          | 9                | 20          | 4                                       | 8           | 5                     | 10          | 12                  | 25          |
| CUB_CCA                                  | -25         | 7           | -26              | 12          | -32                                     | 11          | -22                   | 12          | -14                 | 12          |
| CAR_CCA                                  | -1          | 4           | -1               | 4           | -4                                      | -2          | -2                    | 1           | 2                   | 7           |
| YUC_MEX                                  | 1           | 2           | 3                | 6           | -20                                     | -40         | -19                   | -36         | 10                  | 19          |
| RIG_MEX                                  | -1          | -1          | -1               | -1          | -2                                      | -3          | -1                    | -2          | 0                   | -1          |
| UME_MEX                                  | -2          | -3          | -2               | -2          | -5                                      | -9          | -4                    | -7          | -1                  | -1          |
| <b>South America</b>                     |             |             |                  |             |                                         |             |                       |             |                     |             |
| PAR_ARG                                  | 336         | 691         | 375              | 773         | 151                                     | 328         | 183                   | 385         | 452                 | 912         |
| PAR_BRA                                  | 25          | 394         | 58               | 476         | -62                                     | 133         | 21                    | 250         | 219                 | 707         |
| SAL_ARG                                  | 126         | 329         | 141              | 368         | 48                                      | 159         | 70                    | 194         | 183                 | 442         |
| AMA_BRA                                  | 127         | 241         | 145              | 276         | 40                                      | 82          | 60                    | 115         | 188                 | 347         |
| URU_BRA                                  | 132         | 214         | 149              | 242         | 67                                      | 114         | 87                    | 141         | 183                 | 291         |
| SAN_BRA                                  | 24          | 207         | 51               | 267         | 4                                       | 115         | 35                    | 161         | 107                 | 356         |
| TOC_BRA                                  | 57          | 132         | 65               | 149         | 14                                      | 42          | 27                    | 64          | 92                  | 194         |
| NEB_BRA                                  | 47          | 121         | 75               | 167         | 9                                       | 46          | 29                    | 73          | 116                 | 225         |
| PAR_CSA                                  | 31          | 56          | 43               | 75          | 22                                      | 42          | 32                    | 56          | 54                  | 93          |
| ORLNSA                                   | 8           | 45          | 9                | 49          | 2                                       | 31          | 6                     | 39          | 13                  | 53          |
| AMA_CSA                                  | 13          | 31          | 19               | 44          | 8                                       | 19          | 11                    | 25          | 24                  | 53          |
| AMA_PER                                  | 9           | 31          | 12               | 41          | 7                                       | 28          | 8                     | 30          | 14                  | 43          |
| NWS_COL                                  | 4           | 10          | 8                | 18          | -1                                      | 1           | 1                     | 4           | 12                  | 23          |
| AMA_ECU                                  | 4           | 8           | 5                | 9           | 4                                       | 7           | 4                     | 7           | 5                   | 9           |
| URU_URU                                  | 3           | 4           | 5                | 8           | 3                                       | 4           | 3                     | 5           | 6                   | 9           |
| ORL_COL                                  | 0           | 2           | 1                | 4           | -1                                      | -3          | -1                    | -2          | 1                   | 6           |
| NWS_ECU                                  | 2           | 1           | 4                | 4           | -1                                      | -3          | -1                    | -3          | 4                   | 5           |
| NSA_NSA                                  | 0           | 1           | 1                | 2           | -1                                      | -2          | -1                    | -2          | 1                   | 3           |
| AMA_COL                                  | 0           | 1           | 1                | 2           | 0                                       | 0           | 0                     | 0           | 1                   | 3           |
| TIE_ARG                                  | 0           | 0           | 0                | 0           | 0                                       | 0           | 0                     | 0           | 0                   | 0           |
| PEC_PER                                  | -4          | -4          | -4               | -3          | -8                                      | -7          | -6                    | -5          | -2                  | -1          |
| RIC_ARG                                  | -6          | -4          | -6               | -4          | -11                                     | -8          | -8                    | -6          | -4                  | -2          |
| CHC_CHL                                  | 3           | -6          | 6                | -6          | 4                                       | -20         | 6                     | -10         | 6                   | 7           |

Note: The values represent carbon stock losses from additional land conversion between 2010 and 2050. Positive values should be interpreted as a loss in carbon stock, and thus higher carbon emissions. The lower bound reflects carbon storage losses if 100% of crop land expands over existing pasture land, while the upper bound reflects carbon storage losses if 100% of crop land expands over natural vegetation. Considered crops in the analysis are maize, rice, wheat, soybeans, sugarcane, potatoes, sorghum. FPU = Food Producing Unit. To locate Food Producing Units see S1 Figure and S1 Table. BAU refers to the Business-as-Usual scenario. Scenarios are described in Table 1 in the main text. Those FPUs are listed first that show the highest total losses of carbon stocks according to the upper bound land expansion pathway under the BAU scenario.
