# Supplementary material for: The Role of Latin America’s Land and Water Resources for Global Food Security: Environmental Trade-Offs of Future Food Production Pathways
Source: PubMed Central journal article supplement (PMC4305321; doi:10.1371/journal.pone.0116733), 2015-01-24
Supplement: pone.0116733.s017.pdf [file pone.0116733.s017.pdf]

**S6 Table. Net changes in carbon stock losses due to livestock production across Food Producing Units in Latin America and the Caribbean between 2010 to 2050 (in million tons)**

| FPU                                      | (1) BAU | (1a) BAU liberal | (2) Intensification / (3) Sust.-intens. | (4) Yield gaps closed | (5) Extensification |
|------------------------------------------|---------|------------------|-----------------------------------------|-----------------------|---------------------|
| <b>Central America and the Caribbean</b> |         |                  |                                         |                       |                     |
| CAR_CCA                                  | 39      | 65               | 61                                      | 61                    | 94                  |
| CUB_CCA                                  | 20      | 63               | 57                                      | 57                    | 111                 |
| YUC_MEX                                  | 43      | 59               | 54                                      | 53                    | 94                  |
| MIM_MEX                                  | 18      | 25               | 23                                      | 23                    | 40                  |
| CAM_CCA                                  | 0       | 0                | 0                                       | 0                     | 0                   |
| RIG_MEX                                  | 0       | 0                | 0                                       | 0                     | 0                   |
| UME_MEX                                  | 0       | 0                | 0                                       | 0                     | 0                   |
| YUC_CCA                                  | 0       | 0                | 0                                       | 0                     | 0                   |
| <b>South America</b>                     |         |                  |                                         |                       |                     |
| ORI_NSA                                  | 803     | 1081             | 1032                                    | 1033                  | 1534                |
| NEB_BRA                                  | 627     | 629              | 625                                     | 626                   | 852                 |
| TOC_BRA                                  | 603     | 606              | 601                                     | 602                   | 820                 |
| AMA_CSA                                  | 344     | 468              | 448                                     | 448                   | 663                 |
| AMA_PER                                  | 254     | 340              | 327                                     | 326                   | 480                 |
| URU_URU                                  | 254     | 330              | 316                                     | 316                   | 475                 |
| PAR_CSA                                  | 220     | 259              | 255                                     | 253                   | 361                 |
| PAR_ARG                                  | 132     | 223              | 188                                     | 186                   | 332                 |
| SAL_ARG                                  | 69      | 128              | 105                                     | 103                   | 193                 |
| AMA_ECU                                  | 78      | 100              | 95                                      | 95                    | 142                 |
| AMA_BRA                                  | -482    | 73               | 29                                      | 25                    | 184                 |
| NSA_NSA                                  | 54      | 73               | 69                                      | 69                    | 103                 |
| AMA_COL                                  | 59      | 60               | 58                                      | 58                    | 82                  |
| NWS_ECU                                  | 43      | 50               | 49                                      | 49                    | 69                  |
| CHC_CHL                                  | 0       | 0                | 0                                       | 0                     | 0                   |
| ORI_COL                                  | 0       | 0                | 0                                       | 0                     | 0                   |
| PEC_PER                                  | 0       | 0                | 0                                       | 0                     | 0                   |
| RIC_ARG                                  | 0       | 0                | 0                                       | 0                     | 0                   |
| TIE_ARG                                  | 0       | 0                | 0                                       | 0                     | 0                   |
| URU_BRA                                  | 0       | 0                | 0                                       | 0                     | 0                   |
| NWS_COL                                  | -19     | -3               | -4                                      | -5                    | 22                  |
| SAN_BRA                                  | -65     | -19              | -27                                     | -28                   | 68                  |
| PAR_BRA                                  | -64     | -21              | -29                                     | -30                   | 15                  |

Note: The values represent carbon stock losses from additional land conversion between 2010 and 2050. Positive values should be interpreted as a loss in carbon stock, and thus higher carbon emissions. It is assumed that pasture land due to increasing livestock production entirely expands over natural vegetation. FPU = Food Producing Unit. To locate Food Producing Units see S1 Figure and S1 Table. BAU refers to the Business-as-Usual scenario. Scenarios are described in Table 1 in the main text. Those FPUs are listed first that show the highest total losses of carbon stocks under the BAU scenario.
