# Supplementary material for: The Role of Latin America’s Land and Water Resources for Global Food Security: Environmental Trade-Offs of Future Food Production Pathways
Source: PubMed Central journal article supplement (PMC4305321; doi:10.1371/journal.pone.0116733), 2015-01-24
Supplement: pone.0116733.s018.pdf [file pone.0116733.s018.pdf]

**S7 Table. Species risk of extinction and endangerment due to crop production across Food Producing Units in Latin America and the Caribbean in 2050 (index in %) and net changes between 2010 and 2050 (in %age points)**

| FPU                                      | (1) BAU     |             | (1a) BAU liberal |             | (2) Intensification / Sust.-intens. |             | (4) Yield gaps closed |             | (5) Extensification |             |
|------------------------------------------|-------------|-------------|------------------|-------------|-------------------------------------|-------------|-----------------------|-------------|---------------------|-------------|
|                                          | lower bound | upper bound | lower bound      | upper bound | lower bound                         | upper bound | lower bound           | upper bound | lower bound         | upper bound |
| <b>Central America and the Caribbean</b> |             |             |                  |             |                                     |             |                       |             |                     |             |
| CAM_CCA                                  | 44.4 (+0.1) | 44.9 (+0.6) | 44.4 (+0.1)      | 45.0 (+0.7) | 44.3 (+0.0)                         | 44.5 (+0.2) | 44.4 (+0.1)           | 44.6 (+0.3) | 44.5 (+0.2)         | 45.2 (+0.9) |
| CAR_CCA                                  | 57.8 (+0.1) | 58.2 (+0.6) | 57.8 (+0.1)      | 58.3 (+0.6) | 57.7 (+0.1)                         | 58.0 (+0.3) | 57.7 (+0.1)           | 58.0 (+0.4) | 57.8 (+0.1)         | 58.3 (+0.6) |
| CUB_CCA                                  | 25.2 (+0.0) | 25.3 (+0.1) | 25.3 (+0.0)      | 25.4 (+0.2) | 25.3 (+0.0)                         | 25.4 (+0.2) | 25.3 (+0.0)           | 25.4 (+0.2) | 25.2 (+0.0)         | 25.4 (+0.2) |
| MIM_MEX                                  | 28.9 (+0.0) | 28.9 (+0.0) | 29.0 (+0.0)      | 29.0 (+0.1) | 28.8 (+0.2)                         | 28.1 (-0.8) | 28.8 (-0.1)           | 28.3 (-0.6) | 29.0 (+0.1)         | 29.2 (+0.3) |
| RIG_MEX                                  | 28.5 (+0.0) | 28.5 (+0.0) | 28.5 (+0.0)      | 28.5 (+0.0) | 28.5 (+0.0)                         | 28.4 (-0.1) | 28.5 (-0.1)           | 28.4 (-0.1) | 28.5 (+0.0)         | 28.5 (+0.0) |
| UME_MEX                                  | 28.6 (+0.0) | 28.4 (-0.2) | 28.6 (+0.0)      | 28.4 (-0.2) | 28.6 (-0.1)                         | 28.4 (-0.3) | 28.6 (-0.1)           | 28.4 (-0.3) | 28.6 (+0.0)         | 28.5 (-0.2) |
| YUC_MEX                                  | 33.5 (+0.0) | 33.3 (-0.2) | 33.5 (+0.0)      | 33.4 (-0.2) | 33.4 (-0.2)                         | 32.6 (-0.2) | 33.4 (-0.2)           | 32.7 (-0.8) | 33.6 (+0.0)         | 33.6 (+0.0) |
| <b>South America</b>                     |             |             |                  |             |                                     |             |                       |             |                     |             |
| PAR_ARG                                  | 47.0 (+0.7) | 49.7 (+3.4) | 47.1 (+0.8)      | 50.2 (+3.8) | 46.7 (+0.3)                         | 47.9 (+1.5) | 46.7 (+0.3)           | 48.1 (+1.7) | 47.3 (+0.9)         | 50.8 (+4.4) |
| PAR_BRA                                  | 58.1 (+0.6) | 60.6 (+3.0) | 58.2 (+0.7)      | 61.0 (+3.5) | 57.8 (+0.3)                         | 59.0 (+1.4) | 57.9 (+0.3)           | 59.2 (+0.3) | 58.3 (+0.8)         | 61.6 (+4.1) |
| SAL_ARG                                  | 49.1 (+0.5) | 51.3 (+2.7) | 49.1 (+0.6)      | 51.6 (+3.1) | 48.8 (+0.3)                         | 50.0 (+1.5) | 48.8 (+0.3)           | 50.2 (+1.6) | 49.2 (+0.7)         | 52.0 (+3.5) |
| CHC_CHL                                  | 41.9 (+0.5) | 44.0 (+2.6) | 42.0 (+0.5)      | 44.1 (+2.7) | 41.7 (+0.3)                         | 43.0 (+1.5) | 41.7 (+0.3)           | 43.1 (+1.6) | 42.0 (+0.5)         | 44.2 (+2.7) |
| URU_BRA                                  | 58.9 (+0.5) | 60.8 (+2.4) | 59.0 (+0.6)      | 61.3 (+2.8) | 58.7 (+0.2)                         | 59.6 (+1.2) | 58.7 (+0.3)           | 59.8 (+0.3) | 59.1 (+0.6)         | 61.7 (+3.3) |
| SAN_BRA                                  | 52.9 (+0.2) | 53.9 (+1.3) | 52.9 (+0.3)      | 54.1 (+1.5) | 52.8 (+0.1)                         | 53.3 (+0.7) | 52.8 (+0.2)           | 53.4 (+0.8) | 53.0 (+0.3)         | 54.4 (+1.8) |
| NEB_BRA                                  | 48.8 (+0.2) | 49.5 (+0.9) | 48.9 (+0.2)      | 49.8 (+1.2) | 48.7 (+0.1)                         | 49.0 (+0.4) | 48.7 (+0.1)           | 49.1 (+0.5) | 48.9 (+0.3)         | 50.0 (+1.4) |
| TOC_BRA                                  | 45.9 (+0.2) | 46.6 (+0.8) | 45.9 (+0.2)      | 46.7 (+0.9) | 45.8 (+0.0)                         | 45.9 (+0.2) | 45.8 (+0.1)           | 46.0 (+0.3) | 46.0 (+0.2)         | 46.9 (+1.2) |
| AMA_BRA                                  | 20.2 (+0.1) | 20.5 (+0.5) | 20.2 (+0.1)      | 20.6 (+0.5) | 20.1 (+0.0)                         | 20.2 (+0.1) | 20.1 (+0.0)           | 20.2 (+0.2) | 20.2 (+0.1)         | 20.7 (+0.7) |
| PAR_CSA                                  | 37.5 (+0.1) | 37.8 (+0.4) | 37.5 (+0.1)      | 38.1 (+0.6) | 37.5 (+0.1)                         | 37.7 (+0.3) | 37.5 (+0.1)           | 37.8 (+0.4) | 37.6 (+0.2)         | 38.2 (+0.8) |
| ORL_NSA                                  | 35.7 (+0.1) | 36.0 (+0.3) | 35.7 (+0.1)      | 36.0 (+0.4) | 35.7 (+0.0)                         | 35.9 (+0.3) | 35.7 (+0.0)           | 36.0 (+0.3) | 35.7 (+0.1)         | 36.0 (+0.3) |
| AMA_ECU                                  | 27.4 (+0.1) | 27.7 (+0.3) | 27.4 (+0.1)      | 27.7 (+0.3) | 27.4 (+0.0)                         | 27.6 (+0.3) | 27.4 (+0.1)           | 27.6 (+0.3) | 27.4 (+0.1)         | 27.7 (+0.4) |
| RIC_ARG                                  | 16.2 (+0.1) | 16.4 (+0.3) | 16.2 (+0.1)      | 16.4 (+0.3) | 16.2 (+0.1)                         | 16.4 (+0.3) | 16.2 (+0.1)           | 16.5 (+0.3) | 16.2 (+0.0)         | 16.4 (+0.3) |
| PEC_PER                                  | 20.5 (+0.0) | 20.7 (+0.2) | 20.6 (+0.1)      | 20.9 (+0.4) | 20.6 (+0.1)                         | 20.9 (+0.1) | 20.6 (+0.1)           | 20.9 (+0.1) | 20.5 (+0.1)         | 20.7 (+0.3) |
| AMA_PER                                  | 18.9 (+0.0) | 19.0 (+0.2) | 18.9 (+0.1)      | 19.1 (+0.3) | 18.9 (+0.0)                         | 19.0 (+0.2) | 18.9 (+0.0)           | 19.0 (+0.2) | 18.9 (+0.1)         | 19.1 (+0.3) |
| AMA_CSA                                  | 26.7 (+0.0) | 26.9 (+0.2) | 26.8 (+0.1)      | 27.0 (+0.3) | 26.7 (+0.0)                         | 26.8 (+0.1) | 26.7 (+0.0)           | 26.8 (+0.1) | 26.8 (+0.1)         | 27.0 (+0.3) |
| NWS_COL                                  | 41.7 (+0.1) | 41.8 (+0.1) | 41.7 (+0.0)      | 41.9 (+0.2) | 41.7 (+0.0)                         | 41.7 (+0.0) | 41.7 (+0.0)           | 41.7 (+0.0) | 41.8 (+0.0)         | 41.9 (+0.2) |
| AMA_COL                                  | 20.2 (+0.0) | 20.2 (+0.0) | 20.2 (+0.0)      | 20.3 (+0.0) | 20.2 (+0.0)                         | 20.2 (+0.0) | 20.2 (+0.0)           | 20.2 (+0.0) | 20.2 (+0.0)         | 20.3 (+0.1) |
| TIE_ARG                                  | 11.4 (+0.0) | 11.4 (+0.0) | 11.4 (+0.0)      | 11.4 (+0.0) | 11.4 (+0.0)                         | 11.4 (+0.0) | 11.4 (+0.0)           | 11.4 (+0.0) | 11.4 (+0.0)         | 11.4 (+0.0) |
| NSA_NSA                                  | 13.8 (+0.0) | 13.8 (+0.0) | 13.8 (+0.0)      | 13.8 (+0.0) | 13.8 (+0.0)                         | 13.7 (-0.1) | 13.8 (+0.0)           | 13.7 (-0.1) | 13.8 (+0.0)         | 13.9 (+0.0) |
| ORL_COL                                  | 29.9 (+0.0) | 29.9 (+0.0) | 29.9 (+0.0)      | 29.9 (+0.0) | 29.9 (+0.0)                         | 29.8 (-0.1) | 29.9 (+0.0)           | 29.8 (-0.1) | 29.9 (+0.0)         | 29.9 (+0.0) |
| NWS_ECU                                  | 44.1 (-0.1) | 43.7 (-0.5) | 44.1 (-0.1)      | 43.8 (-0.4) | 44.1 (-0.1)                         | 43.5 (-0.7) | 44.1 (-0.1)           | 43.5 (-0.6) | 44.1 (-0.1)         | 43.9 (-0.3) |

Note: Values show the percentage of species being threatened or endangered of extinction in the year 2050 in each FPU under different scenarios. The value in parentheses give the percentage point change compared to 2010 given different crop production and cropland expansion pathways. The lower bound reflects a risk of biodiversity loss if 100% of crop land expands over existing pasture land, while the upper bound reflects a risk of biodiversity loss if 100% of crop land expands over natural vegetation. Considered crops in the analysis are maize, rice, wheat, soybeans, sugarcane, sorghum, FPU = Food Producing Unit. To locate Food Producing Units see S1 Figure and S1 Table. BAU refers to the Business-as-Usual scenario. Scenarios are described in Table 1 in the main text. Those FPUs are listed first that show the highest increase in risk of biodiversity loss according to the upper bound land expansion pathway under the BAU scenario.
