# Supplementary material for: The Role of Latin America’s Land and Water Resources for Global Food Security: Environmental Trade-Offs of Future Food Production Pathways
Source: PubMed Central journal article supplement (PMC4305321; doi:10.1371/journal.pone.0116733), 2015-01-24
Supplement: pone.0116733.s019.pdf [file pone.0116733.s019.pdf]

**S8 Table. Species risk of extinction and endangerment due to livestock production across Food Producing Units in Latin America and the Caribbean in 2050 (index in %) and net changes between 2010 and 2050 (in %age points)**

| FPU                                      | (1) BAU |        | (1a) BAU liberal |        | (2) Intensification / (3) Sust.-intens. |        | (4) Yield gaps closed |        | (5) Extensification |         |
|------------------------------------------|---------|--------|------------------|--------|-----------------------------------------|--------|-----------------------|--------|---------------------|---------|
| <b>Central America and the Caribbean</b> |         |        |                  |        |                                         |        |                       |        |                     |         |
| MIM_MEX                                  | 29.5    | (+0.6) | 29.7             | (+0.8) | 29.7                                    | (+0.7) | 29.7                  | (+0.7) | 30.2                | (+1.2)  |
| CAM_CCA                                  | 44.3    | (+0.0) | 44.3             | (+0.0) | 44.3                                    | (+0.0) | 44.3                  | (+0.0) | 44.3                | (+0.0)  |
| CAR_CCA                                  | 57.7    | (+0.0) | 57.7             | (+0.0) | 57.7                                    | (+0.0) | 57.7                  | (+0.0) | 57.7                | (+0.0)  |
| CUB_CCA                                  | 41.4    | (+0.0) | 41.4             | (+0.0) | 41.4                                    | (+0.0) | 41.4                  | (+0.0) | 41.4                | (+0.0)  |
| RIG_MEX                                  | 28.5    | (+0.0) | 28.5             | (+0.0) | 28.5                                    | (+0.0) | 28.5                  | (+0.0) | 28.5                | (+0.0)  |
| UME_MEX                                  | 28.7    | (+0.0) | 28.7             | (+0.0) | 28.7                                    | (+0.0) | 28.7                  | (+0.0) | 28.7                | (+0.0)  |
| YUC_MEX                                  | 33.6    | (+0.0) | 33.6             | (+0.0) | 33.6                                    | (+0.0) | 33.6                  | (+0.0) | 36.3                | (+2.8)  |
| <b>South America</b>                     |         |        |                  |        |                                         |        |                       |        |                     |         |
| TOC_BRA                                  | 52.2    | (+6.5) | 52.2             | (+6.5) | 52.2                                    | (+6.4) | 52.2                  | (+6.5) | 54.3                | (+8.5)  |
| ORL_NSA                                  | 41.6    | (+5.9) | 43.4             | (+7.7) | 43.1                                    | (+7.4) | 43.1                  | (+7.4) | 46.2                | (+10.5) |
| AMA_ECU                                  | 33.0    | (+5.6) | 34.4             | (+7.0) | 34.1                                    | (+6.7) | 34.1                  | (+6.7) | 36.9                | (+9.5)  |
| PAR_CSA                                  | 42.3    | (+4.9) | 43.1             | (+5.7) | 43.0                                    | (+5.6) | 43.0                  | (+5.6) | 45.1                | (+7.7)  |
| AMA_CSA                                  | 30.8    | (+4.1) | 32.1             | (+5.4) | 31.9                                    | (+5.2) | 31.9                  | (+5.2) | 34.1                | (+7.3)  |
| AMA_PER                                  | 21.6    | (+2.8) | 22.5             | (+3.6) | 22.3                                    | (+3.5) | 22.3                  | (+3.5) | 23.7                | (+4.9)  |
| AMA_COL                                  | 22.7    | (+2.5) | 22.8             | (+2.6) | 22.7                                    | (+2.5) | 22.7                  | (+2.5) | 23.6                | (+3.4)  |
| NSA_NSA                                  | 16.0    | (+2.2) | 16.7             | (+2.8) | 16.5                                    | (+2.7) | 16.5                  | (+2.7) | 17.7                | (+3.9)  |
| PAR_ARG                                  | 47.6    | (+1.3) | 48.5             | (+2.1) | 48.2                                    | (+1.8) | 48.2                  | (+1.8) | 49.5                | (+3.1)  |
| CHC_CHL                                  | 25.8    | (+0.5) | 26.9             | (+1.7) | 26.8                                    | (+1.5) | 26.8                  | (+1.5) | 28.1                | (+2.9)  |
| AMA_BRA                                  | 20.1    | (+0.0) | 20.4             | (+0.3) | 20.2                                    | (+0.1) | 20.2                  | (+0.1) | 20.9                | (+0.8)  |
| NEB_BRA                                  | 48.6    | (+0.0) | 48.6             | (+0.0) | 48.6                                    | (+0.0) | 48.6                  | (+0.0) | 48.6                | (+0.0)  |
| NWS_ECU                                  | 44.2    | (+0.0) | 44.2             | (+0.0) | 44.2                                    | (+0.0) | 44.2                  | (+0.0) | 53.8                | (+9.6)  |
| ORL_COL                                  | 29.9    | (+0.0) | 29.9             | (+0.0) | 29.9                                    | (+0.0) | 29.9                  | (+0.0) | 29.9                | (+0.0)  |
| PAR_BRA                                  | 57.5    | (+0.0) | 56.5             | (-1.0) | 56.1                                    | (-1.4) | 56.1                  | (-1.4) | 57.7                | (+0.1)  |
| PEC_PER                                  | 20.5    | (+0.0) | 20.5             | (+0.0) | 20.5                                    | (+0.0) | 20.5                  | (+0.0) | 20.5                | (+0.0)  |
| RIC_ARG                                  | 16.1    | (+0.0) | 16.1             | (+0.0) | 16.1                                    | (+0.0) | 16.1                  | (+0.0) | 16.1                | (+0.0)  |
| SAL_ARG                                  | 48.5    | (+0.0) | 48.5             | (+0.0) | 48.5                                    | (+0.0) | 48.5                  | (+0.0) | 48.5                | (+0.0)  |
| SAN_BRA                                  | 52.6    | (+0.0) | 52.6             | (+0.0) | 52.6                                    | (+0.0) | 52.6                  | (+0.0) | 52.6                | (+0.0)  |
| TIE_ARG                                  | 11.4    | (+0.0) | 11.4             | (+0.0) | 11.4                                    | (+0.0) | 11.4                  | (+0.0) | 11.4                | (+0.0)  |
| URU_BRA                                  | 58.4    | (+0.0) | 58.4             | (+0.0) | 58.4                                    | (+0.0) | 58.4                  | (+0.0) | 58.4                | (+0.0)  |
| NWS_COL                                  | 40.1    | (-1.7) | 41.5             | (-0.2) | 41.4                                    | (-0.4) | 41.3                  | (-0.4) | 42.2                | (+0.5)  |

Note: Values show the percentage of species being threatened or endangered of extinction in the year 2050 in each FPU under different scenarios. The value in parentheses give the percentage point change compared to 2010. It is assumed that pasture land due to increasing livestock production entirely expands over natural vegetation. FPU = Food Producing Unit. To locate Food Producing Units see S1 Figure and S1 Table. BAU refers to the Business-as-Usual scenario. Scenarios are described in Table 1 in the main text. Those FPUs are listed first that show the highest increase in risk of biodiversity loss under the BAU scenario.
